# Supplementary material
Source: PubMed Central journal article supplement (PMC6939371)
Supplement: rstb20190174supp1.pdf [file rstb20190174supp1.pdf]

# Electronic Supplementary Material

*The conflict within: origin, proliferation and persistence of a spontaneously arising selfish mitochondrial genome*

Joseph J Dubie, Avery R Caraway, McKenna M Stout, Vaishali Katju and Ulfar Bergthorsson

*Philosophical Transactions of the Royal Society B  
Biological Sciences*

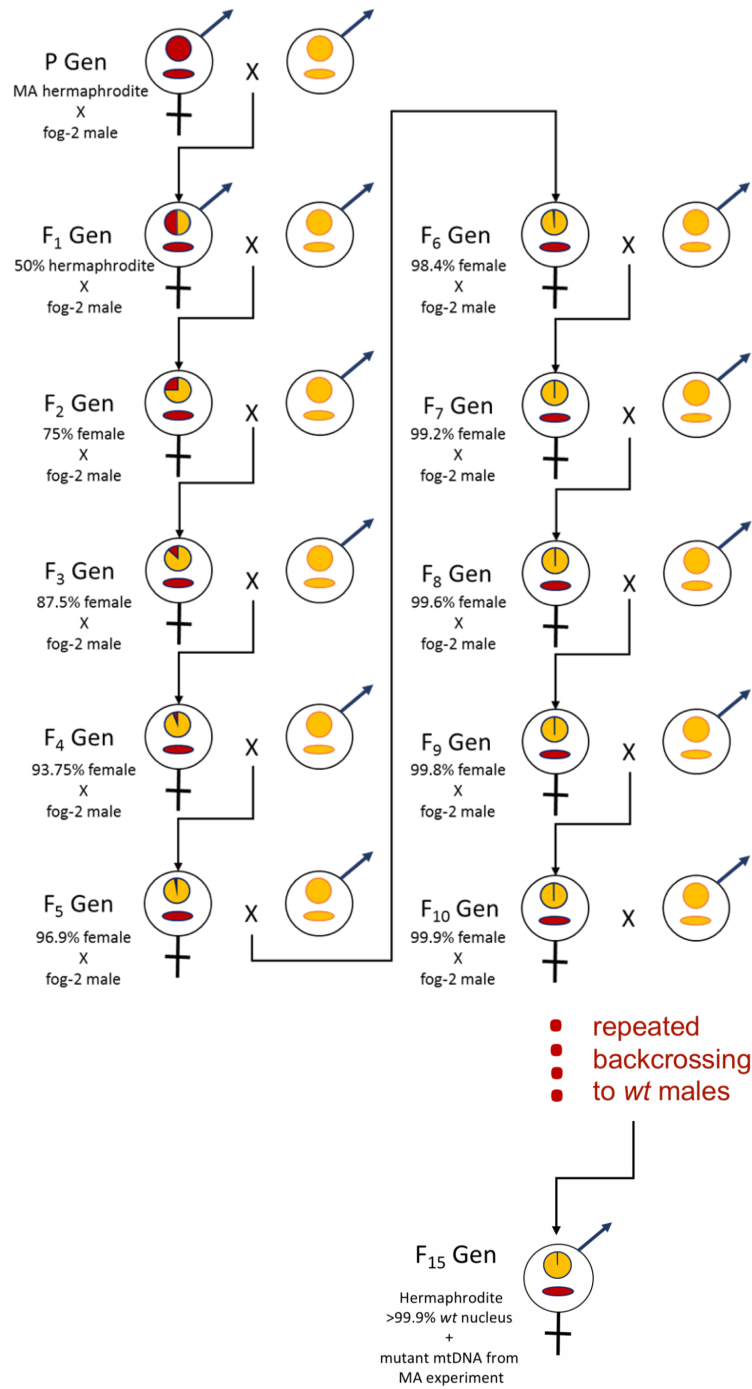

**Figure S1.** Schematic of the backcrossing experiment to sequester the mutant mitochondrial genome bearing the *ctb-1* deletion within a wild-type nuclear background. After 15 generations of backcrossing mutant mtDNA-bearing *C. elegans* hermaphrodites to wild-type *C. elegans* males (*fog-2* or *N2*), only 0.003% of the nuclear genome from the original 1G mutation accumulation line is expected to remain, ensuring that the mitochondrial deletion is no longer associated with any other nuclear mutations that arose during the course of the mutation accumulation experiment.

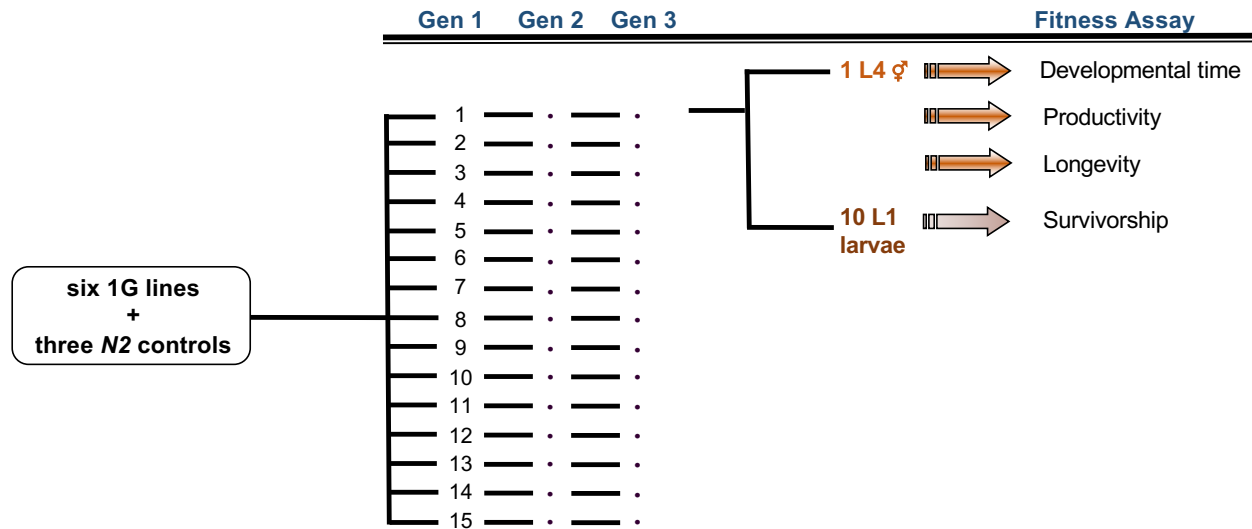

**Figure S2.** Design of assays for four fitness-related traits. Three *N2* control and six replicate lines of 1G with the *ctb-1* deletion bearing mitochondrial genome sequestered in a wild-type nuclear background were assayed. For experimental or control lines, 15 within line replicates were established and propagated for two additional generations by single-progeny descent to remove environmental effects. The F3 generation worms were utilized for the fitness assays. 10 L1 larvae per line were isolated soon upon hatching and utilized for measuring survivorship to adulthood. One L4 larva, a sibling of the ten larvae utilized for the survivorship assay was used for measuring three additional fitness-related traits, namely developmental time, productivity and longevity.

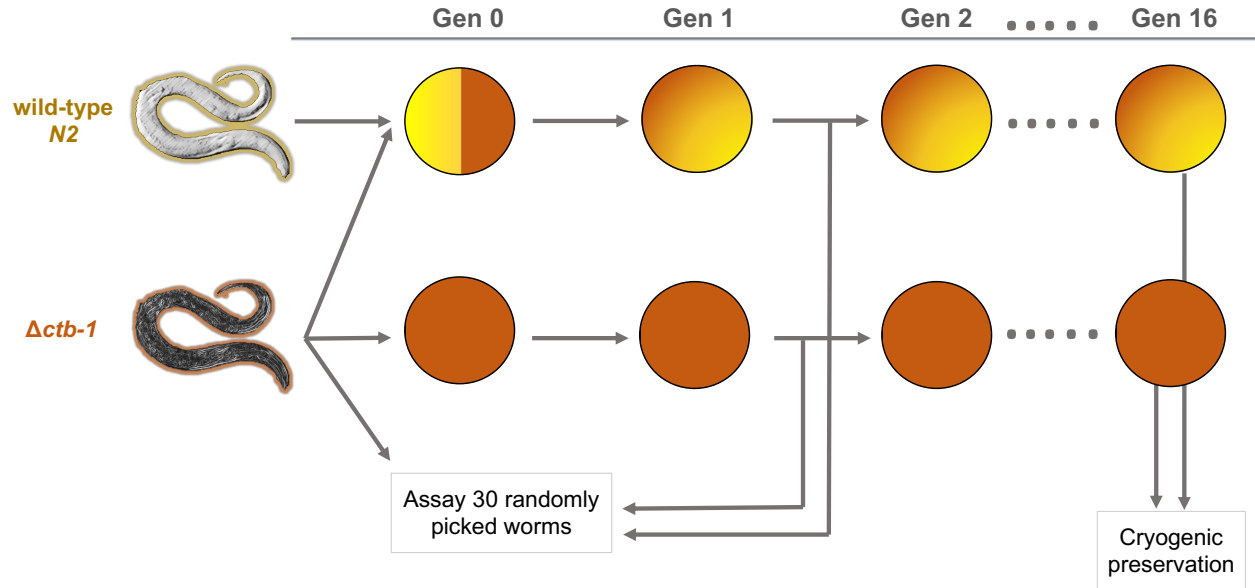

**Figure S3. Design of the competition experiment.** 50 WT *N2* hermaphrodites and 50  $\Delta ctb-1$  mtDNA-bearing 1G hermaphrodites from the backcrossing experiment were used to establish each of the five replicate populations comprising the competition assays. Non-competed control populations of 1G replicate lines were established with 50 L4 hermaphrodites from each of five  $\Delta ctb-1$  mtDNA bearing replicate lines of 1G. Three days after establishing each new generation, 30 randomly picked worms were each analyzed for the presence of the  $\Delta ctb-1$  mitotype. On day 4, the entire worm population on the NGM plate was bleached and the eggs transferred to a new plate to establish the next generation. The bleaching procedure was repeated every four days for 16 generations and the frequency analysis was performed in each of the 16 generations.

**Table S1. Probes for Bio-Rad ddPCR assay for quantification of mtDNA copy-number.**

| Gene           | Assay ID      | Quencher   | Probe Fluorophore | Location                          | MIQE Context                                                                                                                         |
|----------------|---------------|------------|-------------------|-----------------------------------|--------------------------------------------------------------------------------------------------------------------------------------|
| <i>actin-2</i> | dCNS59442090  | Iowa Black | FAM               | Chr. V:<br>11077658..<br>11077779 | CACCCAGTACTTCTCACTGAAGCCCCACTCAATCCAAAGGCTAACCGTG<br>AAAAGATGACCCAAATCATGTTTCGAGACCTTCAATACCCAGCCATGTA<br>TGTCGCCATCCAAGCTGTCCTCTCC  |
| <i>ctb-1</i>   | dCNS821148280 | Iowa Black | FAM               | mtDNA:<br>5056..5177              | AGCTATTCTAGTTATTGTATTGGGGCATTTAATTTTTTTACACAGAACTGG<br>TAGAACATCTAGGTTATATTGCCACGGTGATTATGATAAAGTTTGTTTTA<br>GACCTGAGTACTTAGGTAAAGA  |
| <i>cox-1</i>   | dCNS484374227 | Iowa Black | HEX               | mtDNA:<br>8189..8310              | CATCTATATTATTAATTTTAGATGCTTGTTTTGTAGATATAGGTTGTGGGA<br>CTAGGTGAACAGTCTACCCACCTTTAAGAACAATGGGGCACCCCTGGAAG<br>TAGAGTAGATTTAGCTATTTTTA |

**Table S2.** Fitness of  $\Delta ctb-1$  bearing worms relative to WT N2 controls. Fitness was tested under benign laboratory conditions. Four fitness-related traits namely productivity, survivorship to adulthood, developmental time and longevity were assayed in three N2 controls (C1-C3) and six experimental lines of 1G with the *ctb-1* deletion bearing mitochondrial genome sequestered in a wild-type nuclear background. Where possible, data was collected for 15 replicates per experimental and control line. Grey cells signify missing data.

| Line | Replicate | Survivorship | Developmental Time (hrs) | Longevity (days) | Productivity |
|------|-----------|--------------|--------------------------|------------------|--------------|
| C1   | 1         | 0.9          | 51                       | 19               | 279          |
| C1   | 2         | 1            | 53                       | 12               | 274          |
| C1   | 3         | 1            | 53                       | 21               | 286          |
| C1   | 4         | 0.9          | 53                       | 13               | 312          |
| C1   | 5         | 0.9          | 51                       | 9                | 282          |
| C1   | 6         | 1            | 49                       | 21               | 326          |
| C1   | 7         | 1            | 51                       | 18               | 381          |
| C1   | 8         | 1            | 49                       | 11               | 301          |
| C1   | 9         | 1            | 53                       | 17               | 285          |
| C1   | 10        | 1            | 53                       | 11               | 300          |
| C1   | 11        | 1            | 55                       | 11               | 286          |
| C1   | 12        | 1            | 51                       | 22               | 276          |
| C1   | 13        | 1            | 49                       | 13               | 244          |
| C1   | 14        | 1            | 51                       | 11               | 281          |
| C1   | 15        | 1            | 53                       | 18               | 311          |
| C2   | 1         | 1            | 42                       | 26               | 323          |
| C2   | 2         | 1            | 40                       | 25               | 308          |
| C2   | 3         | 1            | 42                       | 18               | 387          |
| C2   | 4         | 1            | 42                       | 21               | 334          |
| C2   | 5         | 1            | 40                       | 10               | 340          |
| C2   | 6         | 1            | 46                       | 17               | 339          |
| C2   | 7         | 1            | 42                       | 18               | 320          |
| C2   | 8         | 1            | 42                       | 10               | 349          |
| C2   | 9         | 1            | 44                       | 17               | 317          |
| C2   | 10        | 1            | 44                       | 13               | 326          |
| C2   | 11        | 1            | 38                       | 23               | 303          |
| C2   | 12        | 1            | 40                       | 18               | 262          |
| C2   | 13        | 1            | 44                       | 21               | 348          |
| C2   | 14        | 1            | 46                       | 12               | 277          |
| C2   | 15        | 1            | 42                       | 20               | 362          |
| C3   | 1         | 1            | 40                       | 14               | 363          |
| C3   | 2         | 1            | 42                       | 15               | 314          |

|      |    |     |    |    |     |
|------|----|-----|----|----|-----|
| C3   | 3  | 1   | 48 | 11 | 346 |
| C3   | 4  | 1   | 48 | 12 | 153 |
| C3   | 5  | 1   | 40 | 10 | 346 |
| C3   | 6  | 1   | 42 | 15 | 325 |
| C3   | 7  | 1   | 42 | 10 | 330 |
| C3   | 8  | 1   | 42 | 18 | 331 |
| C3   | 9  | 1   | 40 | 7  | 250 |
| C3   | 10 | 1   | 44 | 21 | 307 |
| C3   | 11 | 1   | 50 | 20 | 358 |
| C3   | 12 | 1   | 46 | 12 | 340 |
| C3   | 13 | 1   | 44 | 10 | 308 |
| C3   | 14 | 1   | 42 | 18 | 308 |
| C3   | 15 | 1   | 46 | 9  | 311 |
| 1G.C | 1  | 0.9 | 58 | 14 | 0   |
| 1G.C | 2  | 0.6 | 58 | 14 | 3   |
| 1G.C | 3  | 1   | 46 | 13 | 141 |
| 1G.C | 4  | 1   | 52 | 5  | 26  |
| 1G.C | 5  | 0.9 | 52 | 13 | 149 |
| 1G.C | 6  | 1   | 48 | 14 | 0   |
| 1G.C | 7  | 1   | 44 | 14 | 247 |
| 1G.C | 8  | 1   | 58 | 27 | 0   |
| 1G.C | 9  | 0.7 | 58 | 20 | 5   |
| 1G.C | 10 | 1   | 50 | 7  | 151 |
| 1G.C | 11 | 0.8 | 56 | 5  | 18  |
| 1G.C | 12 | 0.8 | 54 | 14 | 320 |
| 1G.C | 13 | 1   | 42 | 7  | 116 |
| 1G.C | 14 | 0.9 | 42 | 7  | 199 |
| 1G.C | 15 | 0.5 | 58 | 7  | 1   |
| 1G.L | 1  | 1   | 53 | 6  | 138 |
| 1G.L | 2  | 0.9 | 55 | 9  | 295 |
| 1G.L | 3  | 0.9 | 61 | 13 | 0   |
| 1G.L | 4  | 0.7 |    | 0  | 0   |
| 1G.L | 5  | 0.9 | 67 | 23 | 0   |
| 1G.L | 6  | 1   | 63 | 22 | 0   |
| 1G.L | 7  | 0.9 | 63 | 6  | 5   |
| 1G.L | 8  | 1   | 55 | 4  | 58  |
| 1G.L | 9  | 1   | 53 | 4  | 76  |
| 1G.L | 10 | 1   | 51 | 13 | 136 |
| 1G.L | 11 | 1   | 61 | 25 | 96  |

|      |    |     |    |    |     |
|------|----|-----|----|----|-----|
| 1G.L | 12 | 1   | 59 | 19 | 13  |
| 1G.L | 13 | 1   | 55 | 18 | 255 |
| 1G.L | 14 | 1   | 49 | 10 | 217 |
| 1G.L | 15 | 0.9 | 57 | 25 | 164 |
| 1G.M | 1  | 1   | 59 | 4  | 43  |
| 1G.M | 2  | 1   | 55 | 5  | 57  |
| 1G.M | 3  | 0.8 | 61 | 9  | 0   |
| 1G.M | 4  | 1   | 61 | 4  | 14  |
| 1G.M | 5  | 1   | 63 | 16 | 0   |
| 1G.M | 6  | 0.9 | 55 | 11 | 37  |
| 1G.M | 7  | 1   | 55 | 11 | 185 |
| 1G.M | 8  | 1   | 55 | 25 | 230 |
| 1G.M | 9  | 1   | 53 | 10 | 178 |
| 1G.M | 10 | 1   | 63 | 25 | 0   |
| 1G.M | 11 | 0.9 | 65 | 11 | 155 |
| 1G.M | 12 | 1   |    | 2  | 0   |
| 1G.M | 13 | 0.9 | 53 | 18 | 182 |
| 1G.M | 14 | 0.9 | 55 | 26 | 216 |
| 1G.M | 15 | 0.9 | 61 | 19 | 8   |
| 1G.N | 1  | 1   | 48 | 18 | 0   |
| 1G.N | 2  | 0.9 | 44 | 4  | 49  |
| 1G.N | 3  | 0.2 | 50 | 5  | 79  |
| 1G.N | 4  | 0.8 | 48 | 17 | 183 |
| 1G.N | 5  | 0.4 | 50 | 16 | 47  |
| 1G.N | 6  | 0.4 | 56 | 4  | 56  |
| 1G.N | 7  | 0.5 | 54 | 16 | 56  |
| 1G.N | 8  | 0.6 | 42 | 15 | 229 |
| 1G.N | 9  | 1   | 46 | 4  | 26  |
| 1G.N | 10 | 1   | 48 | 24 | 0   |
| 1G.N | 11 | 0.9 | 56 | 7  | 114 |
| 1G.N | 12 | 1   | 40 | 11 | 205 |
| 1G.N | 13 | 0.8 | 40 | 11 | 186 |
| 1G.N | 14 | 1   |    | 0  | 0   |
| 1G.N | 15 | 0.9 | 58 | 13 | 57  |
| 1G.T | 1  | 1   | 48 | 13 | 214 |
| 1G.T | 2  | 1   | 40 | 7  | 230 |
| 1G.T | 3  | 1   | 44 | 15 | 167 |
| 1G.T | 4  | 0.8 | 46 | 5  | 130 |



|      |    |     |    |    |     |
|------|----|-----|----|----|-----|
| 1G.T | 5  | 1   | 52 | 14 | 4   |
| 1G.T | 6  | 1   | 40 | 18 | 230 |
| 1G.T | 7  | 1   | 54 | 19 | 172 |
| 1G.T | 8  | 0.9 | 44 | 16 | 332 |
| 1G.T | 9  | 1   | 48 | 5  | 133 |
| 1G.T | 10 | 1   | 48 | 16 | 276 |
| 1G.T | 11 | 0.8 | 44 | 21 | 249 |
| 1G.T | 12 | 0.8 | 44 | 4  | 124 |
| 1G.T | 13 | 1   | 56 | 13 | 166 |
| 1G.T | 14 | 1   | 48 | 4  | 36  |
| 1G.T | 15 | 1   | 46 | 16 | 86  |
| 1G.U | 1  | 1   | 54 | 29 | 0   |
| 1G.U | 2  | 1   | 58 | 7  | 3   |
| 1G.U | 3  | 1   | 44 | 5  | 171 |
| 1G.U | 4  | 1   | 42 | 7  | 143 |
| 1G.U | 5  | 1   | 44 | 14 | 193 |
| 1G.U | 6  | 1   | 46 | 17 | 304 |
| 1G.U | 7  | 1   | 52 | 21 | 103 |
| 1G.U | 8  | 0.6 | 58 | 18 | 0   |
| 1G.U | 9  | 1   | 52 | 18 | 87  |
| 1G.U | 10 | 1   | 58 | 15 | 119 |
| 1G.U | 11 | 1   | 50 | 16 | 230 |
| 1G.U | 12 | 1   | 48 | 14 | 182 |
| 1G.U | 13 | 1   | 58 | 5  | 23  |
| 1G.U | 14 | 0.7 | 52 | 12 | 175 |
| 1G.U | 15 | 1   | 52 | 7  | 83  |
